# Supplementary material for: Comparative Study on Predicting Particulate Matter (PM2.5) Levels Using LSTM Models
Source: Research Square preprint supplement (doi:10.21203/rs.3.rs-436897/v1), 2021-04-29
Supplement: Supplementary file 1 [file 39769936370474887b66abe0.docx]

**
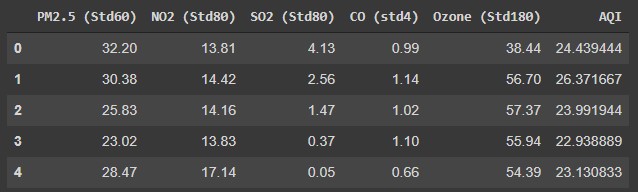
**

**Fig. S1. The first 5 rows of the dataset**

**
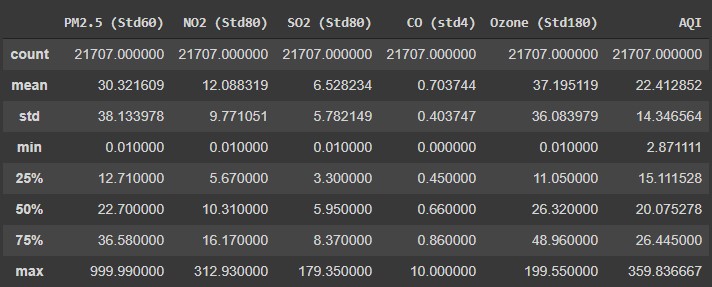
**

**Fig. S2. Descriptive statistics about the dataset**

**
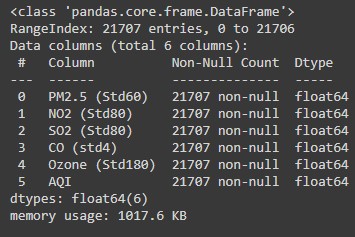
**

**Fig. S3. Information about the dataset**


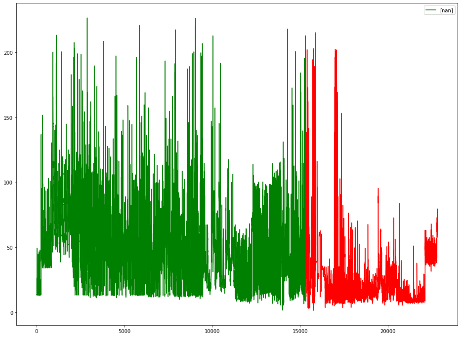

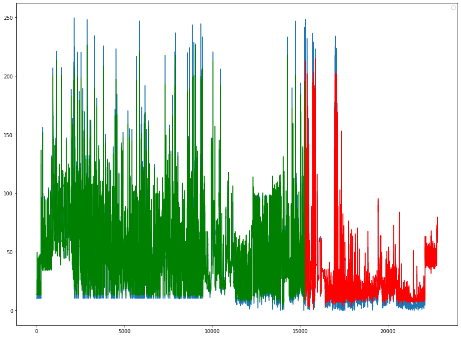


**Fig. S4. (a) PM2.5 values vs Time (b) Comparison of observed vs predicted PM 2.5 values trained for 100 epochs**

**
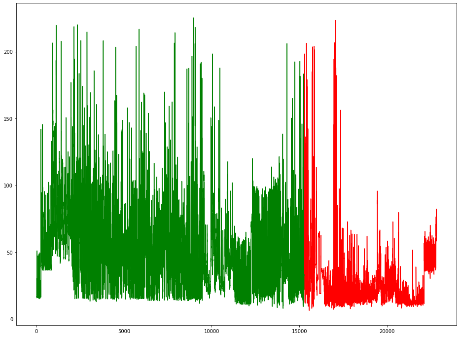

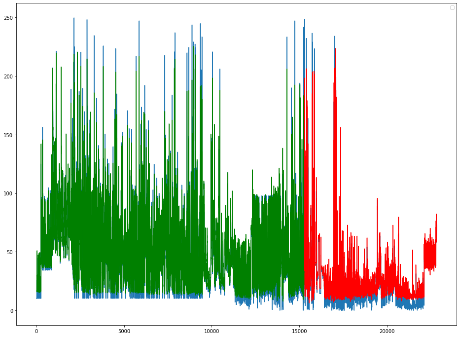
**

**Fig. S5. (a) PM2.5 values vs Time (b) Comparison of observed vs predicted PM 2.5 values trained for 1000 epochs**


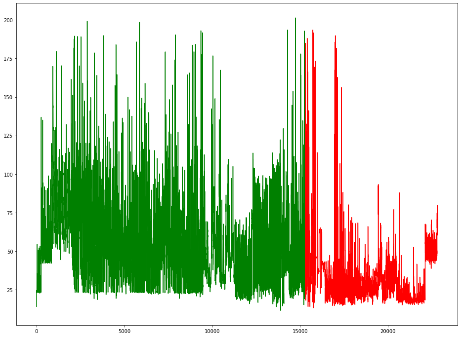

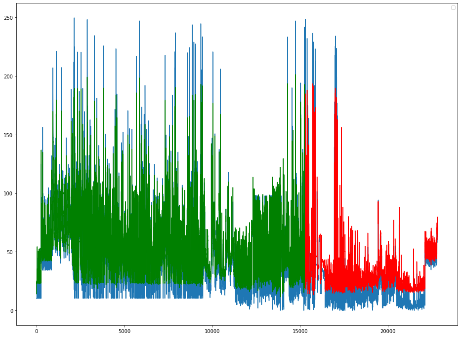


**Fig. S6. (a) PM2.5 values vs Time (b) Comparison of observed vs predicted PM 2.5 values trained for 100 epochs**


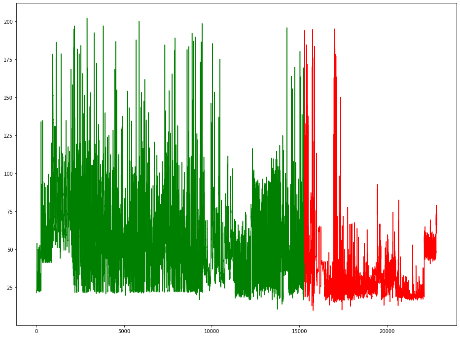

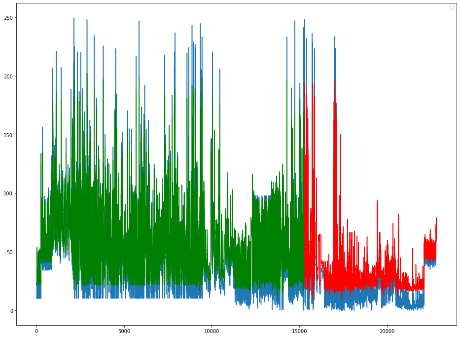


**Fig. S7. (a) PM2.5 values vs Time (b) Comparison of observed vs predicted PM 2.5 values trained for 1000 epochs**


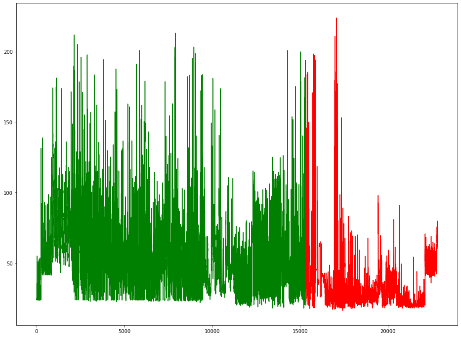

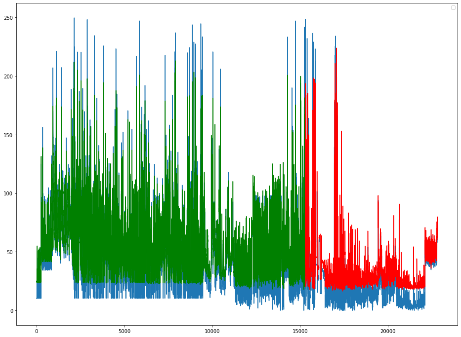


**Fig. S8. (a) PM2.5 values vs Time (b) Comparison of observed vs predicted PM 2.5 values trained for 100 epochs**


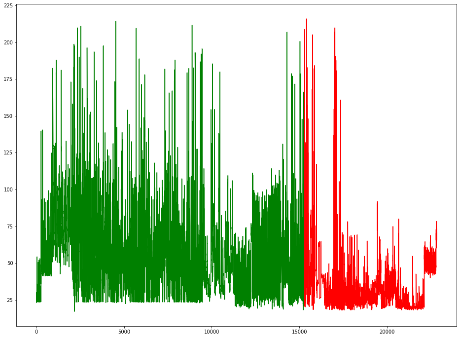

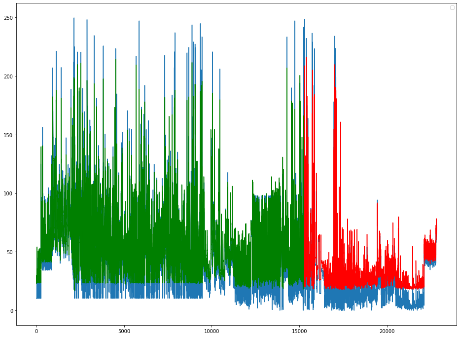


**Fig. S9. (a) PM2.5 values vs Time (b) Comparison of observed vs predicted PM 2.5 values trained for 1000 epochs**
